# Supplementary material
Source: Springer Nature journal article supplement (https://www.springermedizin.de/resource/supplementary/12943_2012_1127_MOESM6_ESM.pdf/9552506)

|              |   |   |   |   |   |   |   |   |
|--------------|---|---|---|---|---|---|---|---|
| RA           | - | + | - | + | - | + | - | + |
| FICZ         | - | - | + | + | - | - | - | - |
| $\alpha$ -NF | - | - | - | - | + | + | - | - |
| $\beta$ -NF  | - | - | - | - | - | - | + | + |

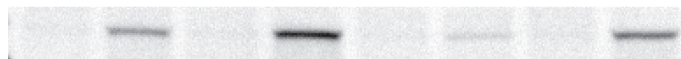

Fgr

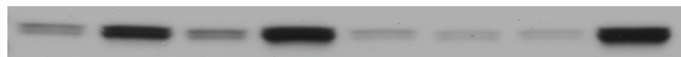

p-Y416 pan-SFK

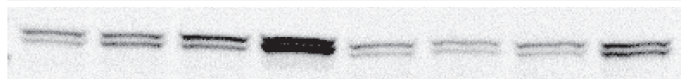

pY507 Lyn

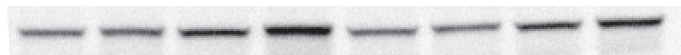

Lyn

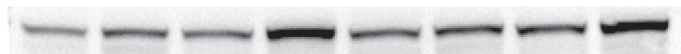

VAV1

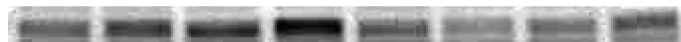

pY458 p85 PI3K

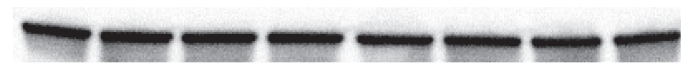

GAPDH

Supplement: MOESM6 [file 9552506]
